# Supplementary material
Source: publisher figshare collection journal article supplement (https://acs.figshare.com/ndownloader/files/4073014)
Supplement: Supplementary file 1 [file 4073014]

## **Supporting Information for**

# **Template-Free Synthesis of Renewable Macroporous Carbon via Yeast Cells for High-Performance Supercapacitor Electrode Materials**

Hongmei Sun, Wenhui He, Chenghua Zong, and Lehui Lu<sup>\*</sup>

State Key Laboratory of Electroanalytical Chemistry, Changchun Institute of Applied Chemistry, Chinese Academy of Sciences, 5625 Renmin Street, Changchun 130022, P.R. China

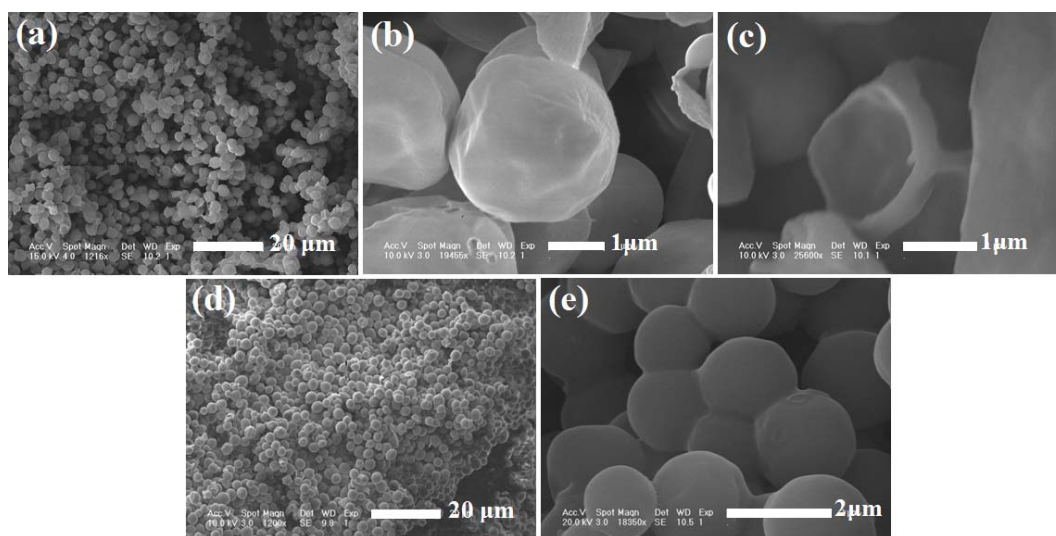

**Figure S1.** SEM images of (a-c) HY and (d, e) HYC.

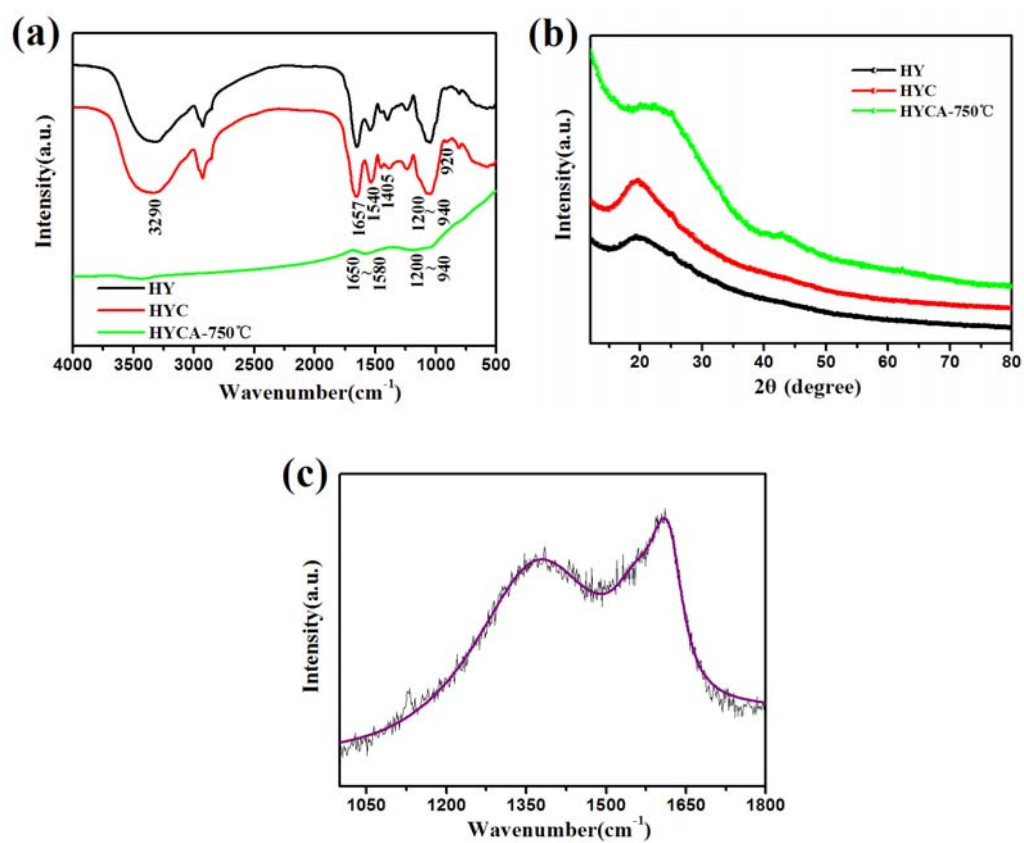

**Figure S2.** (a) FTIR spectra and (b) XRD patterns of HY, HYC and HYCA-750 °C; (c) Raman spectrum of HYCA-750 °C.

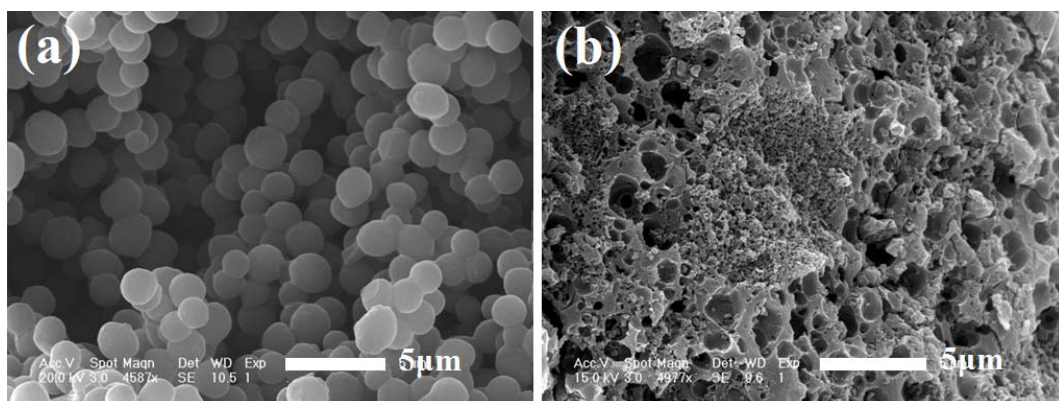

**Figure S3.** SEM images of (a) HYC-750 °C and (b) HYA-750 °C.

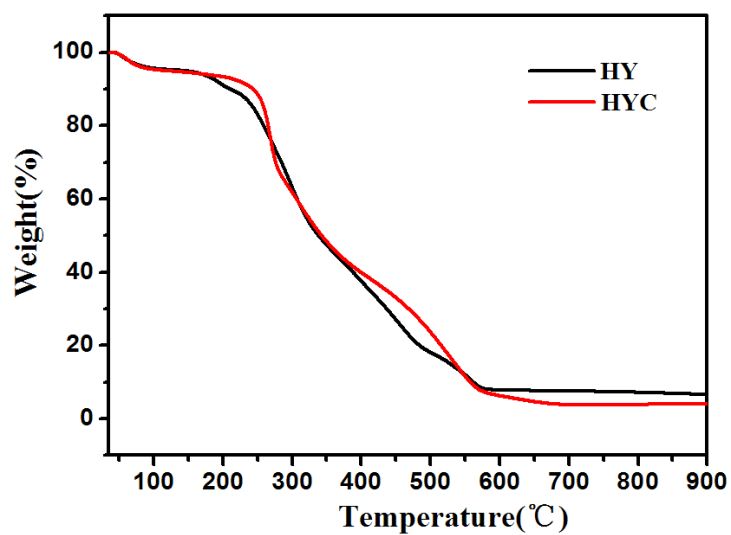

**Figure S4.** TGA curves of HY and HYC.

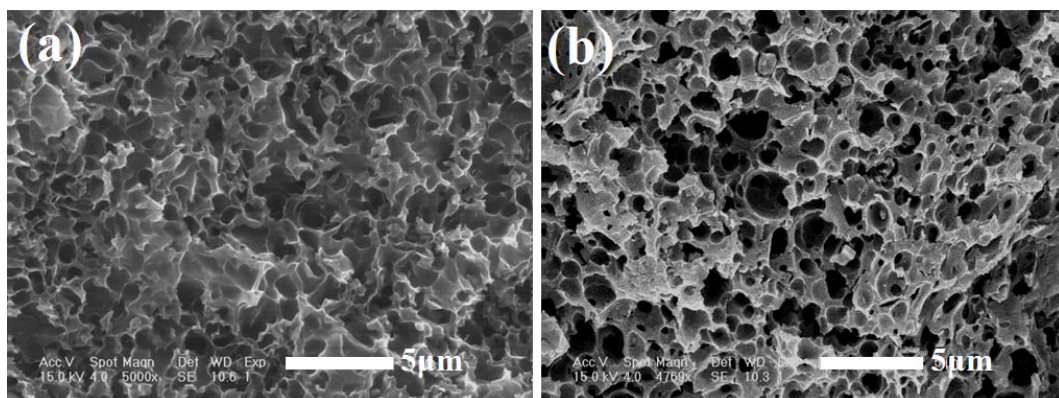

**Figure S5.** SEM images of (a) HYCA-650 °C and (b) HYCA-850 °C.

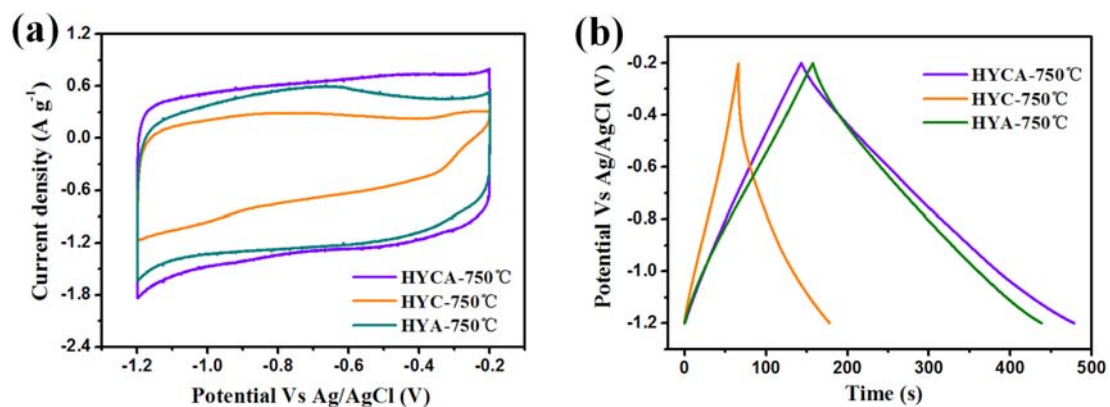

**Figure S6.** (a) CV curves at  $5 \text{ mV s}^{-1}$  and (b) galvanostatic charge/discharge curves at  $1 \text{ A g}^{-1}$  of the samples.

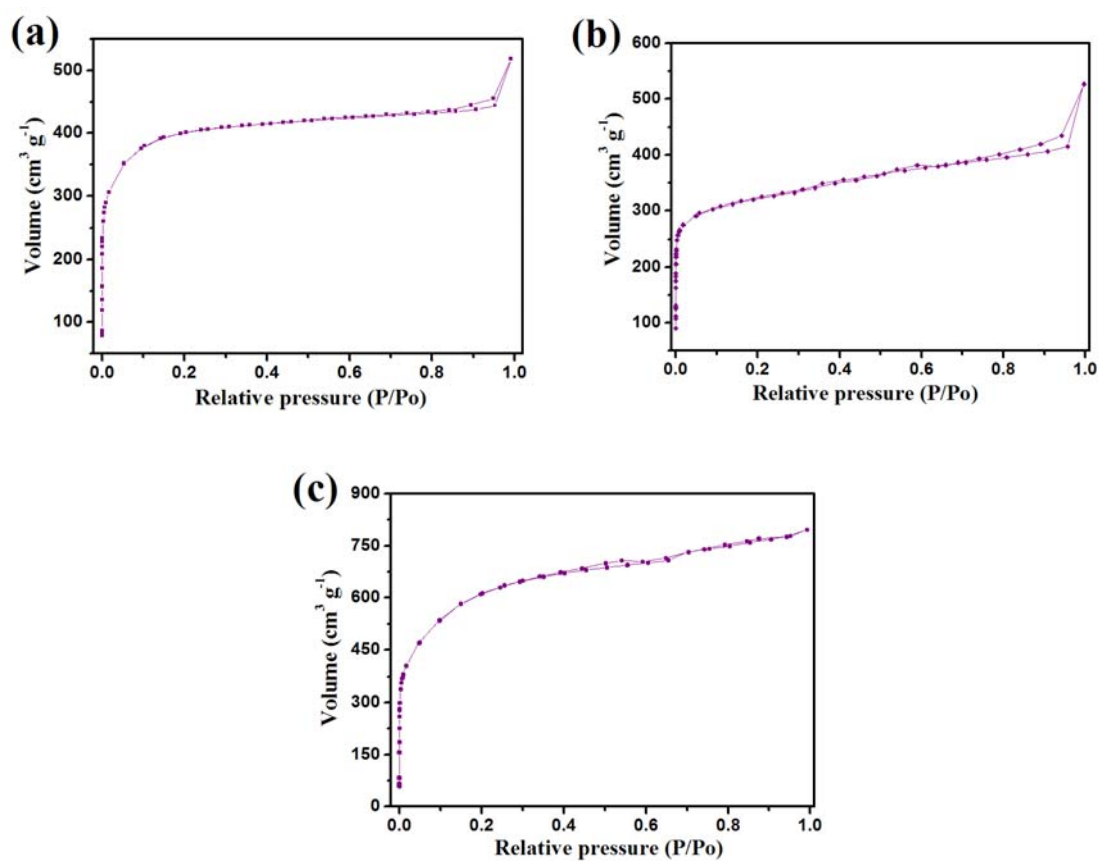

**Figure S7.** Nitrogen adsorption/desorption isotherms of (a) HYCA-750 °C, (b) HYCA-650 °C, (c) HYCA-850 °C.

**Table S1.** Calculated surface area of the samples.

| Sample                                     | HYCA-650 °C | HYCA-750 °C | HYCA-850 °C |
|--------------------------------------------|-------------|-------------|-------------|
| $S_{\text{BET}}(\text{m}^2 \text{g}^{-1})$ | 1002        | 1227        | 2011        |

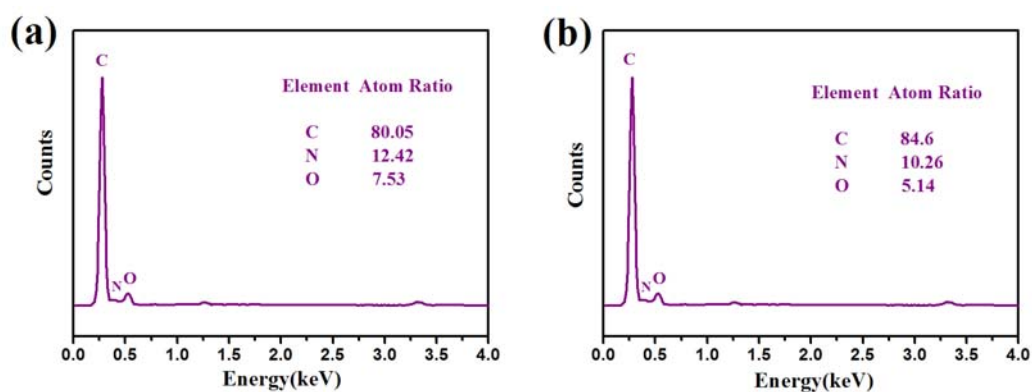

**Figure S8.** EDX analysis of (a) HYCA-650 °C and (b) HYCA-850 °C.

**Table S2.** The atom ratio of the elements in the samples.

| Element          | HYCA-650 °C | HYCA-750 °C | HYCA-850 °C |
|------------------|-------------|-------------|-------------|
| C (Atom Ratio %) | 80.05       | 82.34       | 84.6        |
| N (Atom Ratio %) | 12.42       | 11.39       | 10.26       |
| O (Atom Ratio %) | 7.53        | 6.28        | 5.14        |

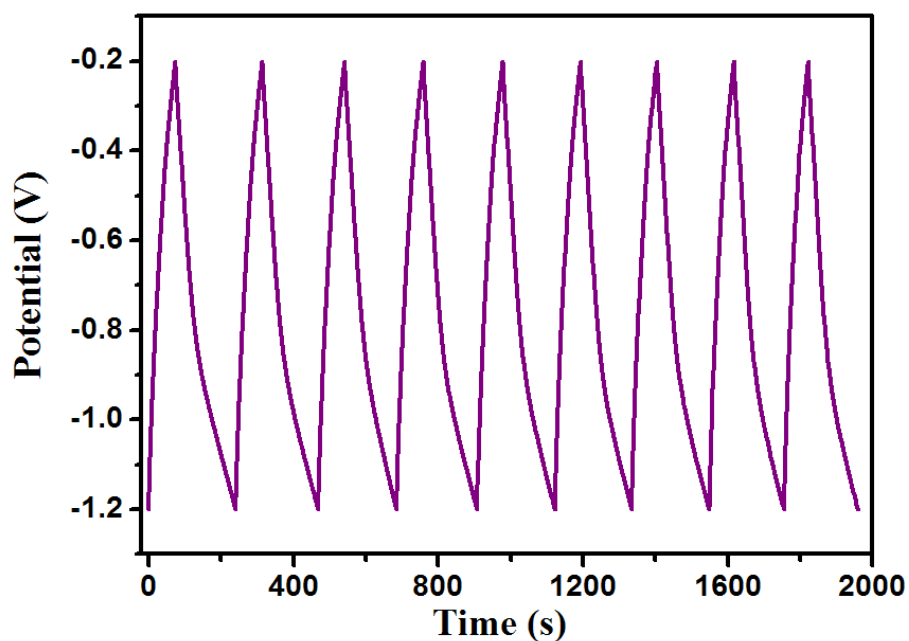

**Figure S9.** Galvanostatic charge/discharge curves of HYCA-750 °C at the current density of  $1 \text{ A g}^{-1}$  in two-electrode system.

For HYCA-750 °C, the specific capacitance of a single electrode at the current density of  $1 \text{ A g}^{-1}$  in a symmetrical two-electrode configuration was calculated to be  $280 \text{ F g}^{-1}$  by the equation:  $C_s = 4(I \Delta t)/(\Delta V m)^{1-3}$  where  $I$  is the current,  $\Delta t$  is the discharge time,  $\Delta V$  is the potential range, and  $m$  is the total mass of HYCA-750 °C on both electrodes, 4 adjusts the capacitance of the cell and the combined mass of two electrodes to the capacitance and mass of a single electrode.

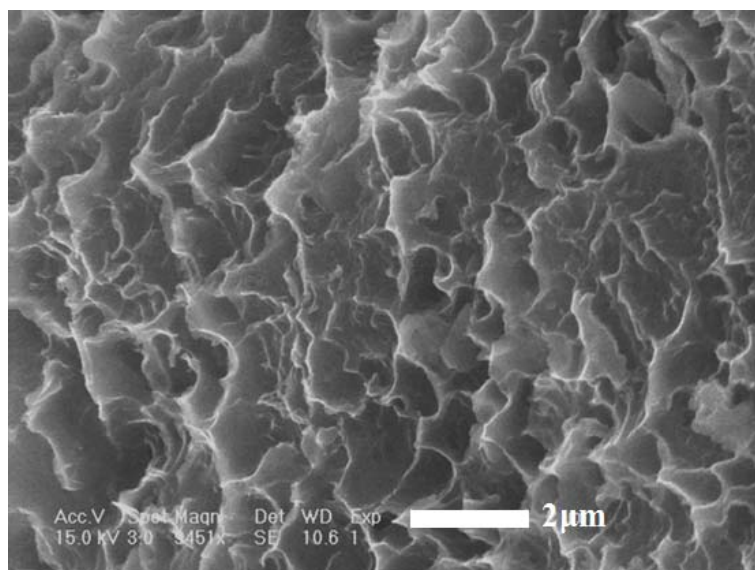

**Figure S10.** SEM image of HYCA-750 °C after 1000 cycles.

**Reference:**

- (1) Stoller M. D.; Ruoff, R. S. *Energy Environ. Sci.* **2010**, 3, 1294-1301.
- (2) Xie, K.; Qin, X.; Wang, X.; Wang, Y.; Tao, H.; Wu, Q.; Yang L.; Hu, Z. *Adv. Mater.* **2011**, 24, 347-352.
- (3) Simon P.; Gogotsi, Y. *Nat. Mater.* **2008**, 7, 845-854.
